# Supplementary material for: The Oregon Child Absenteeism Due to Respiratory Disease Study (ORCHARDS): Rationale, objectives, and design
Source: PubMed Central journal article supplement (PMC8818813; doi:10.1111/irv.12920), 2021-10-08
Supplement: IRV-16-340-s001.pdf [file IRV-16-340-s001.pdf]

# Acute Respiratory Infection and Influenza Surveillance Form

### Criteria for patient selection and testing

- symptom onset within 4 days
- any two of the following
  - o rhinorrhea
  - o nasal congestion
  - o sneezing
  - o sore throat
  - o cough
  - o fever

**School ID:** 4K P N B R M H

**Participant ID:** \_\_\_\_\_

**Age:** \_\_\_\_\_

**Date of Collection:** \_\_\_\_\_

Oregon Child Absenteeism due to Respiratory Disease Study

Days between illness onset and today's visit: \_\_\_\_ days

Exposure to a similar illness 1-3 days prior to ARI onset? Yes No

Likely Source: Classmate Friend Family Member (Adult / Sibling) Other: \_\_\_\_\_

Household Member (circle if living in household, check box if ill with similar ARI):

- |                                         |                                         |                                                            |                                                          |
|-----------------------------------------|-----------------------------------------|------------------------------------------------------------|----------------------------------------------------------|
| Grandmother <input type="checkbox"/>    | Grandfather <input type="checkbox"/>    | Mother ( <i>Female Guardian</i> ) <input type="checkbox"/> | Father ( <i>Male Guardian</i> ) <input type="checkbox"/> |
| O/Y Sibling #1 <input type="checkbox"/> | O/Y Sibling #2 <input type="checkbox"/> | O/Y Sibling #3 <input type="checkbox"/>                    | Other Adult: _____ <input type="checkbox"/>              |
| O/Y Sibling #4 <input type="checkbox"/> | O/Y Sibling #5 <input type="checkbox"/> | O/Y Sibling #6 <input type="checkbox"/>                    | Other Child: _____ <input type="checkbox"/>              |

Recent Travel? Yes No      Recent Exposure to Farm Animals? Yes No

Severity of Illness (circle): Mild Moderate Severe

Race: White Am Indian or Ak Native Asian Black Native Hawaiian or Other Pacific Islander

Ethnicity: Hispanic Non-Hispanic

Measured Temperature \_\_\_\_ °F      Antipyretic use within the last 6 hours? Yes No

Symptoms (circle all that are present):

- |          |          |                |                  |                |              |
|----------|----------|----------------|------------------|----------------|--------------|
| Fever    | Chills   | Cough          | Wheezing         | Runny Nose     | Sore Throat  |
| Malaise  | Myalgia  | Arthralgia     | Nasal Congestion | Headache       | Ear Pain     |
| Anorexia | Vomiting | Abdominal Pain | Diarrhea         | Conjunctivitis | Other: _____ |

Influenza antiviral treatment for this illness prior to this visit? Yes No

Seasonal influenza vaccine prior to this illness? Yes No

Visit to health care provider for this illness prior to home visit? Yes (specify when \_\_\_\_\_) No

Visit to health care provider planned in next few days? Yes (specify when \_\_\_\_\_) No

Indicate Specimen Type(s) for PCR testing: nasopharynx posterior pharynx

----- ITEMS BELOW THIS LINE FOR LABORATORY ONLY -----

Sofia Result:  flu A  flu B  both  negative  invalid

Sample Code: ORCHARDS - \_\_\_\_ - \_\_\_\_ - \_\_\_\_  
site week staff sample
